# Supplementary material
Source: publisher figshare collection journal article supplement (https://karger.figshare.com/ndownloader/files/31560374)
Supplement: Supplementary file 1 [file 31560374]

Online Supplementary Material.

Core word list developed by Pekkala and colleagues (2013)

| Mother  Girl  Sister  Boy  Children/Child  Cookie(s)  Cookie jar/jar  Stool/footstool  Dish(es)  Sink  Water  Window  Floor  Wash | Do  Dry  Wipe  Overflow/flow  Run  Steal  Tip  Fall  Lady  Woman  Plate  Reach  Get  stand |
| --- | --- |
